# Supplementary material
Source: PubMed Central journal article supplement (PMC4136614)
Supplement: 1409860111_pnas.201409860SI.pdf [file 1409860111_pnas.201409860SI.pdf]

# Supporting Information

Vernon et al. 10.1073/pnas.1409860111

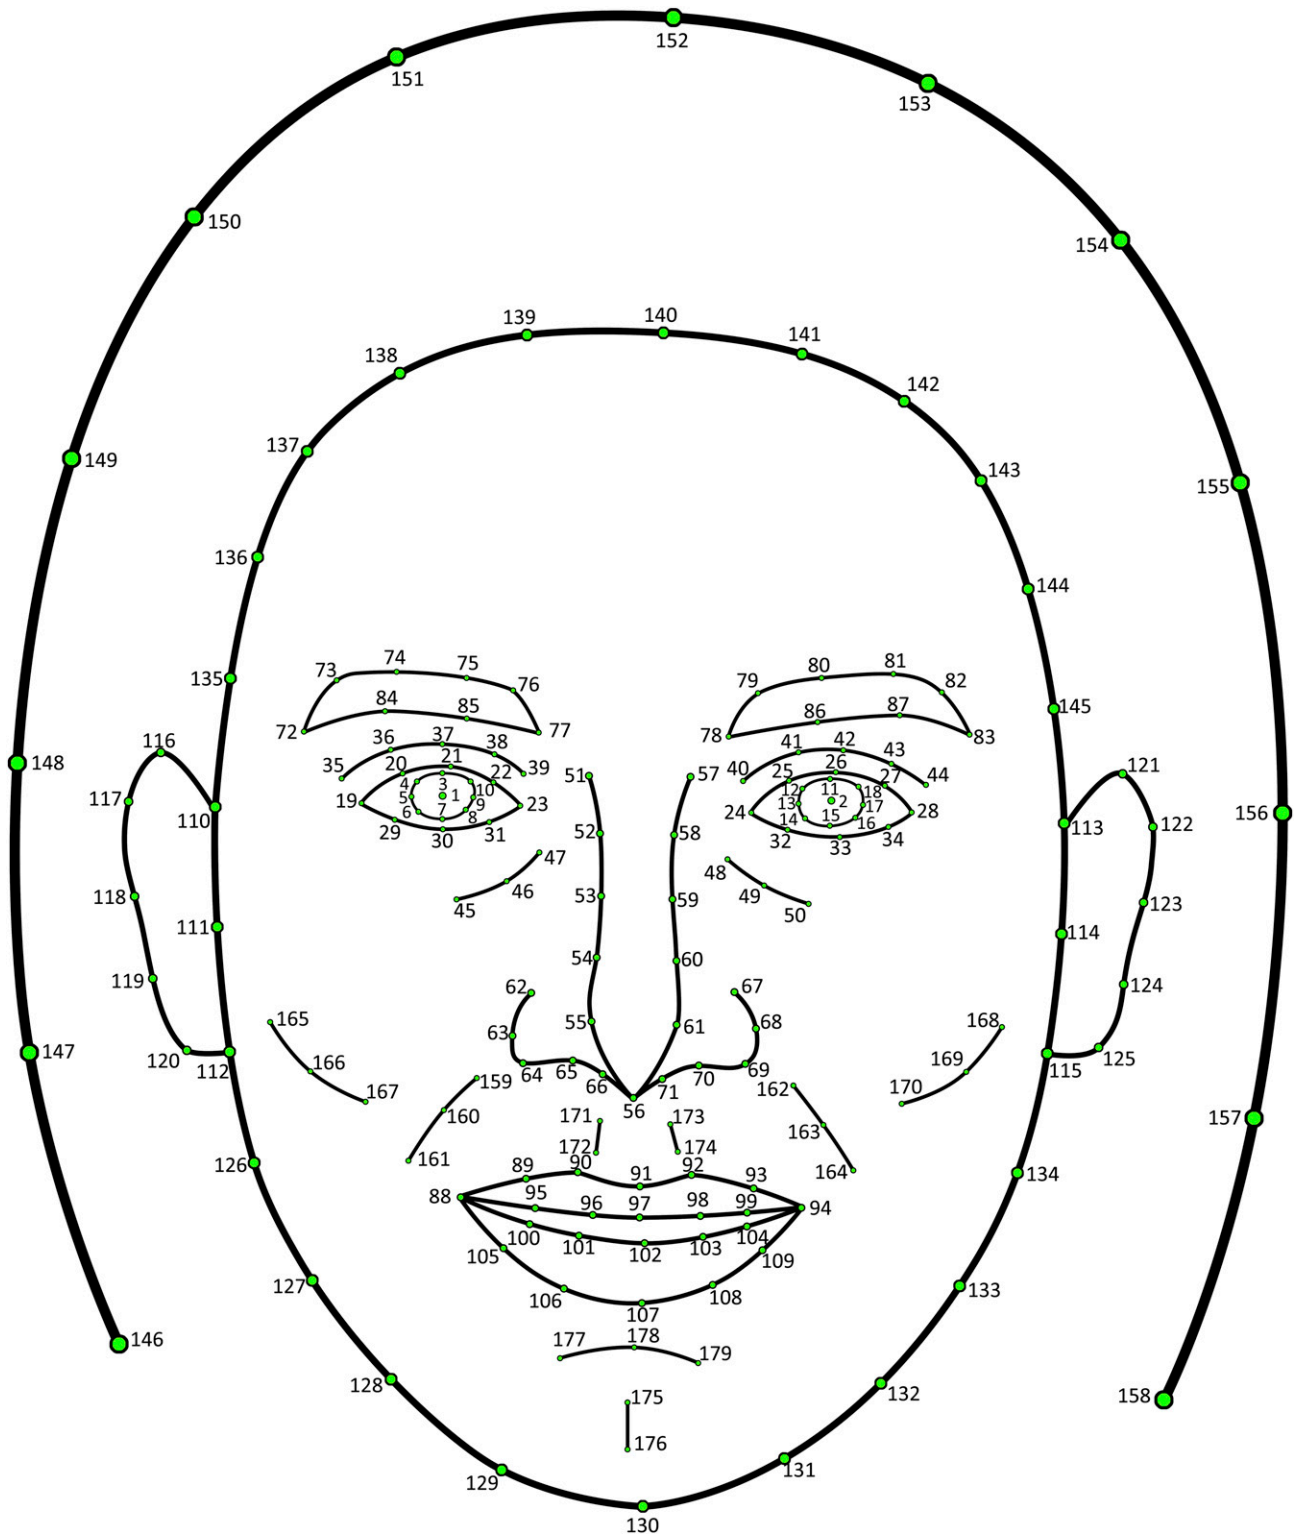

Fig. S1. Key to fiducial points.



**Table S1. Description of attributes derived from ambient face images**

| Attribute                   | Calculation                                                                                                                                                                                                                                                                                                          |
|-----------------------------|----------------------------------------------------------------------------------------------------------------------------------------------------------------------------------------------------------------------------------------------------------------------------------------------------------------------|
| 01. Head area               | Area enclosed by points 135:145, 113:115, 126:134, 110:112                                                                                                                                                                                                                                                           |
| 02. Head height             | Vertical distance between centroid of 139:141 and centroid of 129:131                                                                                                                                                                                                                                                |
| 03. Head width              | Horizontal distance between centroid of 110:112 and centroid of 113:115                                                                                                                                                                                                                                              |
| 04. Head orientation 1      | Absolute x axis coordinate of middle of nose (centroid of 54:56, 60, 61, 66, 71).<br>Should increase as individual looks to the left or right.                                                                                                                                                                       |
| 05. Head orientation 2      | Absolute y axis coordinate of middle of nose (centroid of 54:56, 60, 61, 66, 71).<br>Should increase when looking down (may be confounded by nose length).                                                                                                                                                           |
| 06. Head tilt*              | Gradient of line used for x axis before standardization. Should increase as individual's face becomes tilted (i.e., rotation about nose).                                                                                                                                                                            |
| 07. Eyebrow area            | Area enclosed by points 72:77, 85, 84                                                                                                                                                                                                                                                                                |
| 08. Eyebrow height          | Vertical distance between centroid of 72, 84, 85, 77 and centroid of 73:76                                                                                                                                                                                                                                           |
| 09. Eyebrow width           | Horizontal distance between point 72 and point 77                                                                                                                                                                                                                                                                    |
| 10. Eyebrow gradient*       | Absolute gradient of linear polynomial fitted through points 84, 85, 77.<br>Should increase as eyebrows become arched, or slant downward.                                                                                                                                                                            |
| 11. Eye area                | Area enclosed by points 19:23, 31, 30, 29                                                                                                                                                                                                                                                                            |
| 12. Iris area               | Area enclosed by points 3:10                                                                                                                                                                                                                                                                                         |
| 13. Eye height              | Vertical distance between centroid of 20:22 and centroid of 29:31                                                                                                                                                                                                                                                    |
| 14. Eye width               | Horizontal distance between points 19 and 23                                                                                                                                                                                                                                                                         |
| 15. % Iris*                 | $(1/\pi r^2) \times$ Iris area, where $r$ is 1/2 horizontal distance between points 5 and 9. Intended to show what percentage of the iris is visible, should approach one as iris becomes less hidden and more circular                                                                                              |
| 16. Nose area               | Area enclosed by points 51:54, 62:66, 56, 71:67, 60:57                                                                                                                                                                                                                                                               |
| 17. Nose height             | Vertical distance between points 56 and centroid of 51, 57                                                                                                                                                                                                                                                           |
| 18. Nose width              | Horizontal distance between centroid of 67:69 and centroid of 62:64                                                                                                                                                                                                                                                  |
| 19. Nose curve*             | Coefficient of $x^2$ from quadratic polynomial fitted through points 64:66, 56, 71:69.<br>Should increase as the bottom of the nose becomes less flat                                                                                                                                                                |
| 20. Nose flare              | Vertical distance between centroid of 65, 70 and centroid of 64, 66, 71, 69<br>Should increase as nostrils become dilated/larger.                                                                                                                                                                                    |
| 21. Jaw height              | Vertical distance between centroid of 112, 115 and centroid of 129:131                                                                                                                                                                                                                                               |
| 22. Jaw gradient*           | Absolute gradient of linear polynomial fitted through points 128:130                                                                                                                                                                                                                                                 |
| 23. Jaw deviation           | SD of distances between all points on jaw (126:134) and point at the top of the jaw ( $x$ = average of 112, 115, 126:134; $y$ = average of 112, 115)<br>Should increase as jaw becomes longer/less rounded.                                                                                                          |
| 24. Chin curve*             | Coefficient of $x^2$ from quadratic polynomial fitted through points 128:132. Similar to jaw gradient (should increase as chin gets less rounded)                                                                                                                                                                    |
| 25. Mouth area              | Area enclosed by points 88:94, 109:105                                                                                                                                                                                                                                                                               |
| 26. Mouth height            | Vertical distance between centroid of 88:94 and centroid of 88, 105:109.94                                                                                                                                                                                                                                           |
| 27. Top lip height          | Vertical distance between centroid of 88:94 and centroid of 88, 95:99.94                                                                                                                                                                                                                                             |
| 28. Bottom lip height       | Vertical distance between centroid of 88, 100:104, 94 and centroid of 88, 105:109.94                                                                                                                                                                                                                                 |
| 29. Mouth width             | Horizontal distance between points 94 and 88                                                                                                                                                                                                                                                                         |
| 30. Mouth gap               | Vertical distance between centroid of 88, 95:99, 94 and centroid of 88, 100:104, 94.<br>Should increase with an open mouth.                                                                                                                                                                                          |
| 31. Top lip curve*          | Coefficient of $x^2$ from quadratic polynomial fitted through points 88–95:99–94                                                                                                                                                                                                                                     |
| 32. Bottom lip curve*       | Coefficient of $x^2$ from quadratic polynomial fitted through points 88–100:104–94.<br>The above two attributes should increase with a smile.                                                                                                                                                                        |
| 33. Nose line sep.          | Horizontal distance between centroid of 171:172 and centroid of 173:174                                                                                                                                                                                                                                              |
| 34. Cheekbone position*     | $(1/\text{head height}) \times$ (vertical distance between centroid of 165:170 and centroid of 129:131)                                                                                                                                                                                                              |
| 35. Cheek gradient*         | Absolute gradient of linear polynomial fitted through points 165:167                                                                                                                                                                                                                                                 |
| 36. Eye line gradient*      | Absolute gradient of linear polynomial fitted through points 45:47                                                                                                                                                                                                                                                   |
| 37. Eyes position*          | $(1/\text{head height}) \times$ (vertical distance between centroid of 13:34 and centroid of 129:131)                                                                                                                                                                                                                |
| 38. Eyebrows position*      | $(1/\text{head height}) \times$ (vertical distance between centroid of 72:87 and centroid of 129:131)                                                                                                                                                                                                                |
| 39. Mouth position*         | $(1/\text{head height}) \times$ (vertical distance between centroid of 88:94, 105:109 and centroid of 129:131)                                                                                                                                                                                                       |
| 40. Nose position*          | $(1/\text{head height}) \times$ (vertical distance between centroid of 51:71 and centroid of 129:131)<br>These attributes all return a value between 0 (bottom of face) and 1 (top of face). If nose position was 0.5, it would suggest that the middle of the nose is vertically located in the middle of the face. |
| 41. Eye separation          | Horizontal distance between centroid of 2, 11:18, 24:28, 32:34 and centroid of 1, 3:10, 19:23, 29:31                                                                                                                                                                                                                 |
| 42. Eyes-mouth distance     | Vertical distance between centroid of 23:24 and centroid of 90:92                                                                                                                                                                                                                                                    |
| 43. Eyes-eyebrows distance  | Vertical distance between centroid of 72, 84, 85, 77, 78, 86, 87, 83, and centroid of 20:22, 25:27                                                                                                                                                                                                                   |
| 44. Left jead to left eye   | Horizontal distance between centroid of 110:112 and 19                                                                                                                                                                                                                                                               |
| 45. Right head to right eye | Horizontal distance between centroid of 113:115 and 28                                                                                                                                                                                                                                                               |
| 46. Mouth-chin dististance  | Vertical distance between centroid of 106:108 and centroid of 129:131                                                                                                                                                                                                                                                |
| 47. Mouth-nose distance     | Vertical distance between centroid of 66, 56, 71 and centroid of 90:92                                                                                                                                                                                                                                               |



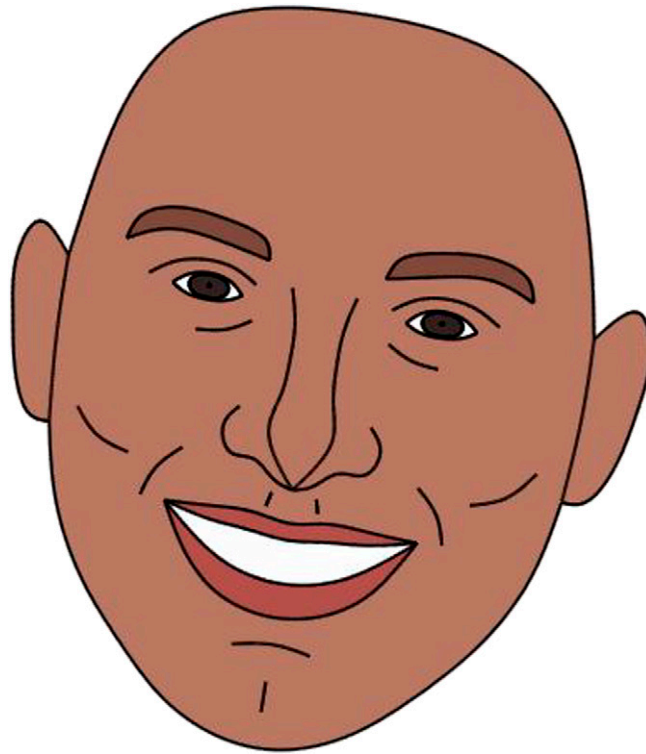

**Movie S1.** Animation showing changes in facial features associated with the Approachability dimension. Face-like images generated using the approach illustrated in Fig. 1 C and D with target factor scores varying from  $(-1, 0, 0)$  to  $(1, 0, 0)$  (and back again).

[Movie S1](#)

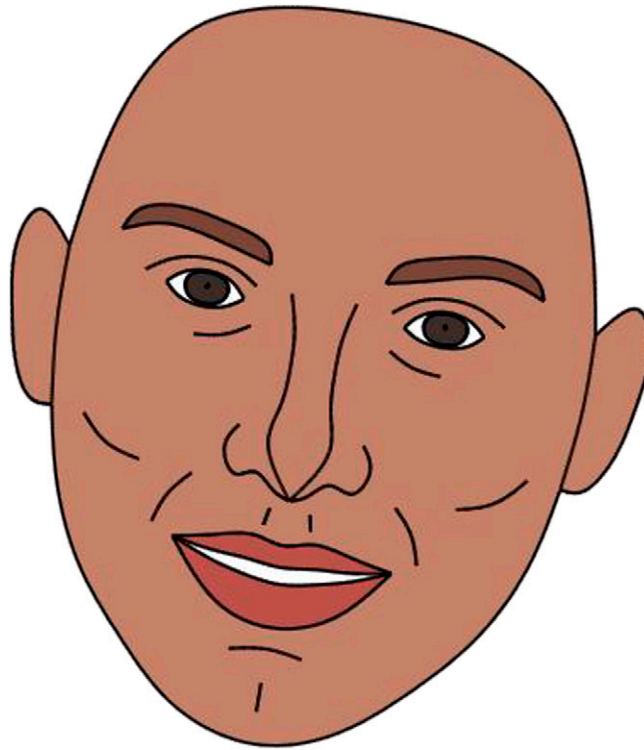

**Movie S2.** Animation showing changes in facial features associated with the Youthful-Attractiveness dimension. Face-like images generated using the approach illustrated in Fig. 1 C and D with target factor scores varying from  $(0, -1, 0)$  to  $(0, 1, 0)$  (and back again).

[Movie S2](#)

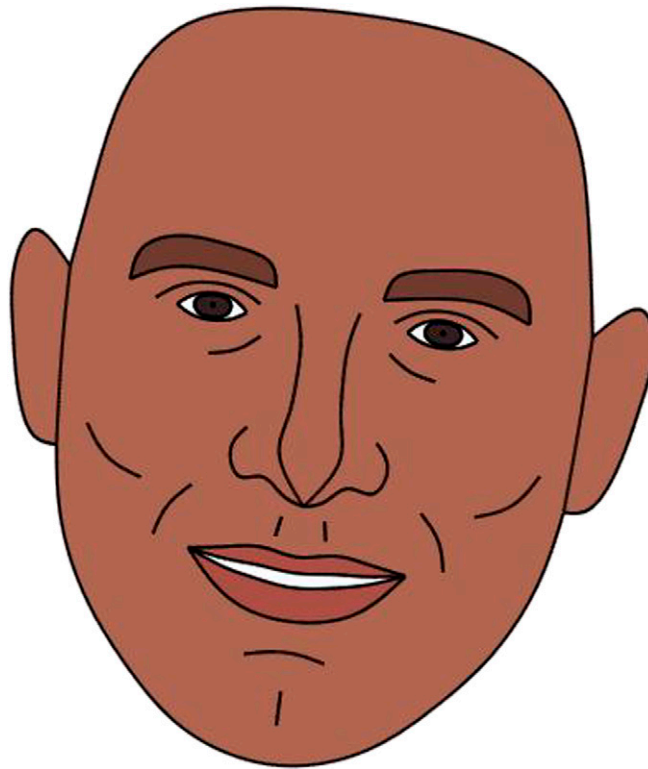

**Movie S3.** Animation showing changes in facial features associated with the Dominance dimension. Face-like images generated using the approach illustrated in Fig. 1 *C* and *D* with target factor scores varying from (0, 0, -1) to (0, 0, 1) (and back again).

[Movie S3](#)
